# Supplementary material for: Different mechanisms and electrocatalytic activities of Ce ion or CeO2 modified Ti/Sb–SnO2 electrodes fabricated by one-step pulse electro-codeposition
Source: Royal Society of Chemistry journal article supplement (doi:10.1039/c5ra01876e), 2015-01-01
Supplement: c5ra01876e1.pdf [file c5ra01876e1.pdf]

## Different Mechanism and Electrocatalytic Activity of Ce ion or CeO<sub>2</sub> Modifying

### Ti/Sb-SnO<sub>2</sub> Electrode fabricated by One-step Pulse Electro-codeposition

#### Supporting Information

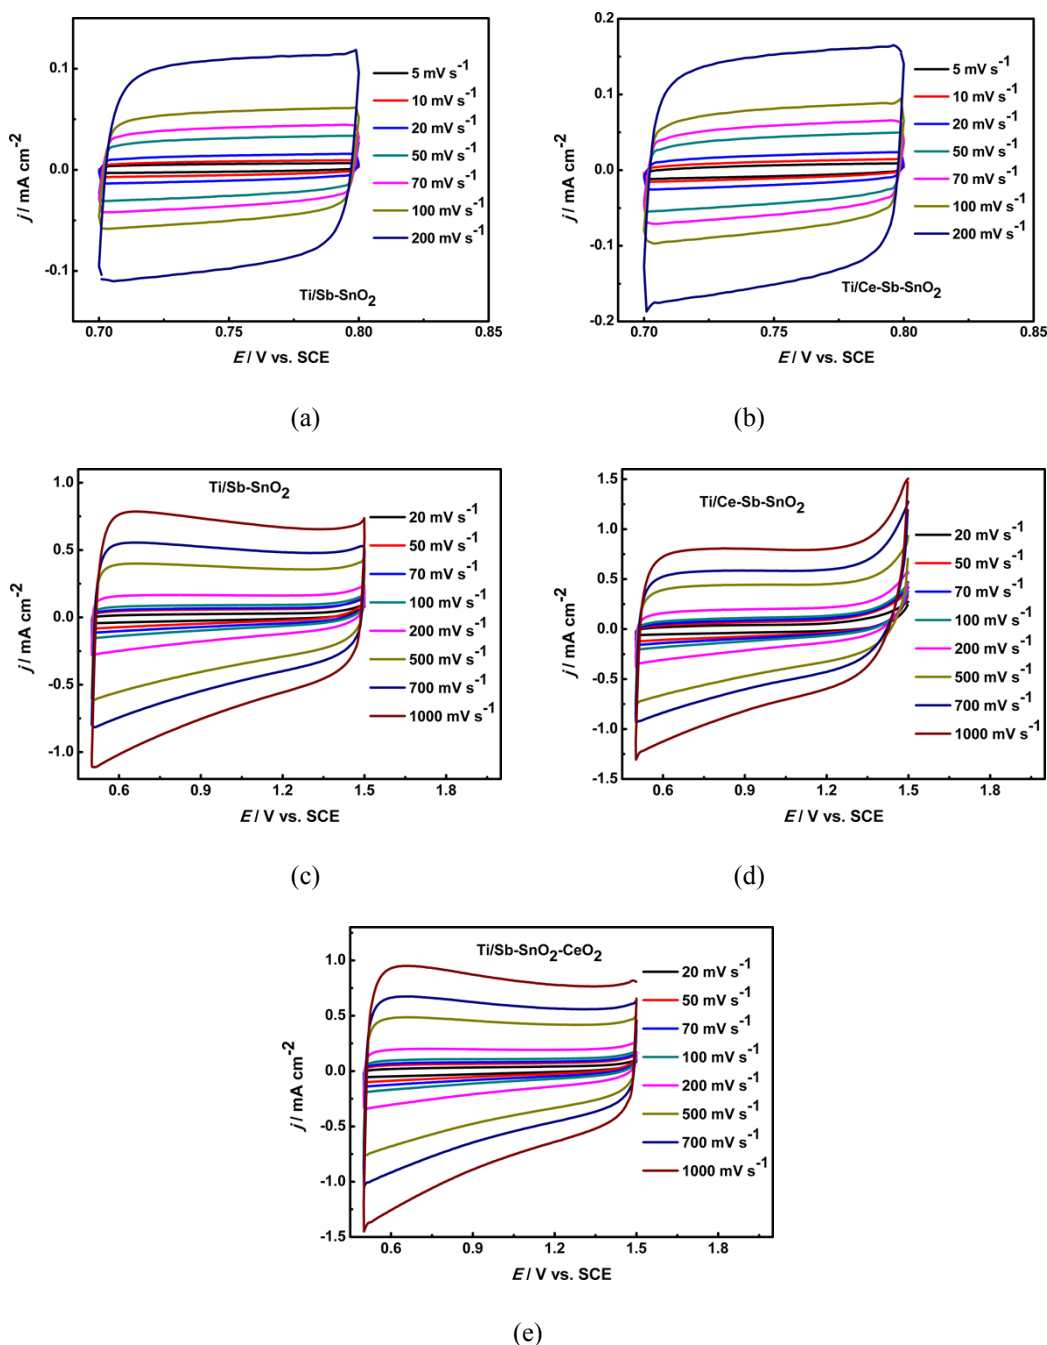

**Fig. S1** Cyclic voltammograms at different sweep rates in 0.25 M Na<sub>2</sub>SO<sub>4</sub> solution: (a) and (b) between 0.7 and 0.8 V; (c), (d) and (e) between 0.5 and 1.5 V.
